# Supplementary material
Source: Springer Nature journal article supplement (https://www.springermedizin.de/resource/supplementary/12937_2010_307_MOESM1_ESM.pdf/25654834)

## Frequency of "Hunger Pains"

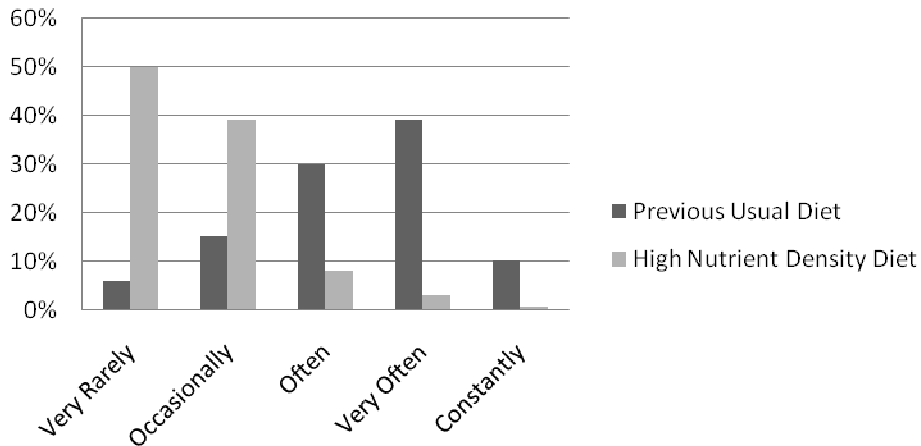

Supplement: MOESM1 [file 25654834]
